# Supplementary material
Source: publisher figshare collection journal article supplement (https://sage.figshare.com/ndownloader/files/17771312)
Supplement: Supplementary file 1 [file 17771312]

## Appendix: Interview codes and information

| Interviewee Code | Member State | Type of Organization                        | Technique | Date of interview |
|------------------|--------------|---------------------------------------------|-----------|-------------------|
| AT_GOV_01        | Austria      | Governmental: Finance                       | In person | 5/8/18            |
| AT_IG_01         | Austria      | Interest Group: Business                    | In person | 5/9/18            |
| AT_IG_02         | Austria      | Interest Group: Business                    | In person | 5/9/18            |
| AT_IG_03         | Austria      | Interest Group: Employees                   | In person | 5/10/18           |
| AT_IG_04         | Austria      | Interest Group: Employers                   | By e-mail | 5/15/18           |
| EE_GOV_01        | Estonia      | Governmental: Finance                       | In person | 5/23/18           |
| EE_GOV_02        | Estonia      | Governmental: Finance                       | In person | 5/23/18           |
| EE_IG_01         | Estonia      | Interest Group: Employers                   | In person | 5/25/18           |
| EE_IG_02         | Estonia      | Interest Group: Finance                     | By e-mail | 5/2/18            |
| EE_IG_03         | Estonia      | Interest Group: Business                    | By e-mail | 5/15/18           |
| FI_GOV_01        | Finland      | Governmental: Finance                       | In person | 5/15/18           |
| FI_IG_01         | Finland      | Interest Group: Employees                   | In person | 5/11/18           |
| FI_IG_02         | Finland      | Interest Group: Business                    | In person | 5/14/18           |
| IE_IG_01         | Ireland      | Interest Group: Employees                   | In person | 5/22/18           |
| IE_IG_02         | Ireland      | Interest Group: Business                    | By e-mail | 4/30/18           |
| NL_GOV_01        | Netherlands  | Governmental: Finance                       | In person | 5/16/18           |
| NL_IG_01         | Netherlands  | Interest Group: Social Partner Organisation | In person | 5/18/18           |
| PT_GOV_01        | Portugal     | Governmental: Finance                       | In person | 5/28/18           |
| PT_IG_01         | Portugal     | Interest Group: Finance                     | In person | 5/18/18           |
| PT_IG_02         | Portugal     | Interest Group: Business                    | By e-mail | 5/30/18           |
| SK_GOV_01        | Slovakia     | Governmental: Finance                       | By Phone  | 5/23/18           |
| SK_IG_01         | Slovakia     | Interest Group: Finance                     | By Phone  | 5/17/18           |
| SI_GOV_01        | Slovenia     | Governmental: Finance                       | In person | 5/17/18           |
| SI_IG_01         | Slovenia     | Interest Group: Business                    | In person | 5/14/18           |
| SI_IG_02         | Slovenia     | Interest Group: Employees                   | In person | 5/14/18           |
| ES_GOV_01        | Spain        | Governmental: Finance                       | In person | 6/5/18            |
| ES_IG_01         | Spain        | Interest Group: Social Partner Organisation | In person | 6/6/18            |
| ES_IG_02         | Spain        | Interest Group: Employees                   | In person | 6/8/18            |
| COM_01           | EU           | European Commission: DG ECFIN               | In person | 11/26/18          |
| COM_02           | EU           | European Commission: DG ECFIN               | In person | 11/27/18          |

|                 |    |                               |           |          |
|-----------------|----|-------------------------------|-----------|----------|
| <b>COM_03</b>   | EU | European Commission: DG ECFIN | In person | 11/28/18 |
| <b>COM_04</b>   | EU | European Commission: DG ECFIN | In person | 11/28/18 |
| <b>COM_05</b>   | EU | European Commission: DG ECFIN | In person | 11/30/18 |
| <b>EU_IG_01</b> | EU | Interest Group: Employees     | In person | 11/26/18 |
| <b>EU_IG_02</b> | EU | Interest Group: Banking       | By e-mail | 11/12/18 |
| <b>EU_IG_03</b> | EU | Interest Group: Business      | In person | 11/27/18 |
